# Supplementary material for: Cyclopolymerization-derived block-copolymers of 4,4-bis(octyloxymethyl)-1,6-heptadiyne with 4,4-dipropargyl malonodinitrile for use in photovoltaics
Source: Royal Society of Chemistry journal article supplement (doi:10.1039/c2py20774e), 2012-12-07
Supplement: c2py20774e.pdf [file c2py20774e.pdf]

## Supporting Information

to

# Cyclopolymerization-Derived Block-Copolymers of 4,4-Bis(octyloxymethyl)-1,6-heptadiyne with 4,4-Dipropargyl Malonodinitrile for Use in Photovoltaics

Mavila Sudheendran<sup>1</sup>, Marta Horecha<sup>2</sup>, Anton Kiriy<sup>2\*</sup>, Suren A. Gevorgyan<sup>3</sup>, Frederik C. Krebs<sup>3</sup>, Dongre Wang<sup>1</sup>, and Michael R. Buchmeiser<sup>1,4\*</sup>

**Table S1.** Summary of cyclopolymerization results for **M1** using **I1- I3**.

| # | initiator | [M]/[I] | $M_n(\text{theor.})$<br>[g/mol] <sup>a</sup> | $M_n(\text{found})$<br>[g/mol] <sup>b</sup> | PDI | $\lambda_{\text{max}}$<br>[nm] <sup>c</sup> | yield<br>[%] <sup>d</sup> |
|---|-----------|---------|----------------------------------------------|---------------------------------------------|-----|---------------------------------------------|---------------------------|
| 1 | <b>I1</b> | 50      | 18800                                        | 52000                                       | 3.5 | 550                                         | 83                        |
| 2 | <b>I2</b> | 25      | 9400                                         | 12000                                       | 3.1 | 549                                         | 25                        |
| 3 | <b>I2</b> | 25      | 9400                                         | 63000                                       | 3.8 | 552                                         | 68 <sup>e</sup>           |
| 4 | <b>I3</b> | 25      | 9400                                         | 180000                                      | 3.4 | 549                                         | 34                        |
| 5 | <b>I3</b> | 50      | 18800                                        | 82000                                       | 3.2 | 550                                         | 84                        |
| 6 | <b>I3</b> | 25      | 9400                                         | 84000                                       | 4.2 | 550                                         | 56 <sup>e</sup>           |

Polymerization conditions: 1,2-dichloroethane except for entries 1 and 5 (in THF),  $T = 50^\circ\text{C}$

entries 1 and 5 at  $0^\circ\text{C}$ ,  $t = 24\text{h}$ , <sup>a</sup>including end groups, <sup>b</sup>determined by SEC vs. PS standards,

<sup>c</sup> in  $\text{CHCl}_3$ , <sup>d</sup>isolated yields, <sup>e</sup> initiator with 10 equiv. 3-Br-Py.

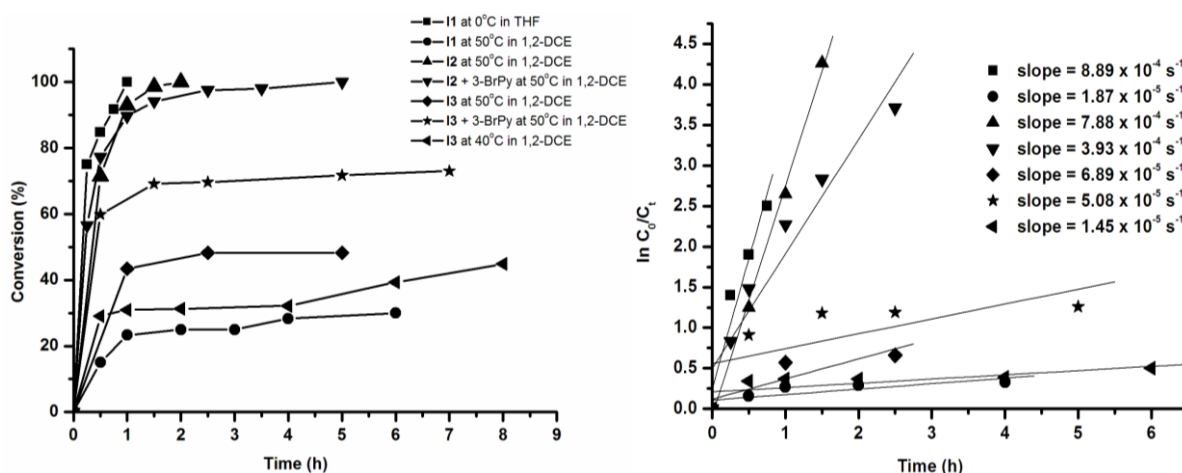

**Figure S1.** Kinetic plots obtained for the homopolymerization of **M1** using **I1-I3** at different reaction conditions. 1<sup>st</sup>-order plots (right)

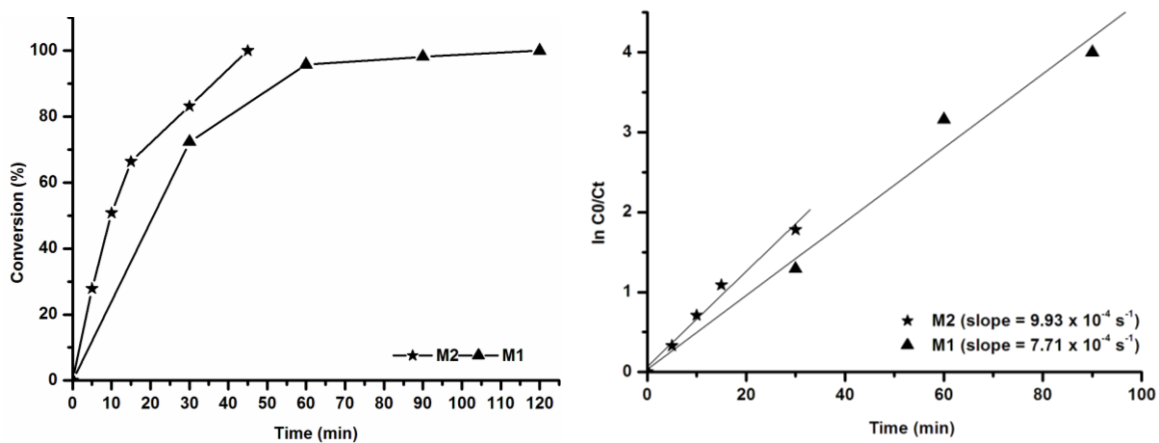

**Figure S2.** Kinetic plot obtained for the synthesis of poly(**M2**)-*b*-poly(**M1**) using **I4** (left), 1<sup>st</sup> order plot (right).

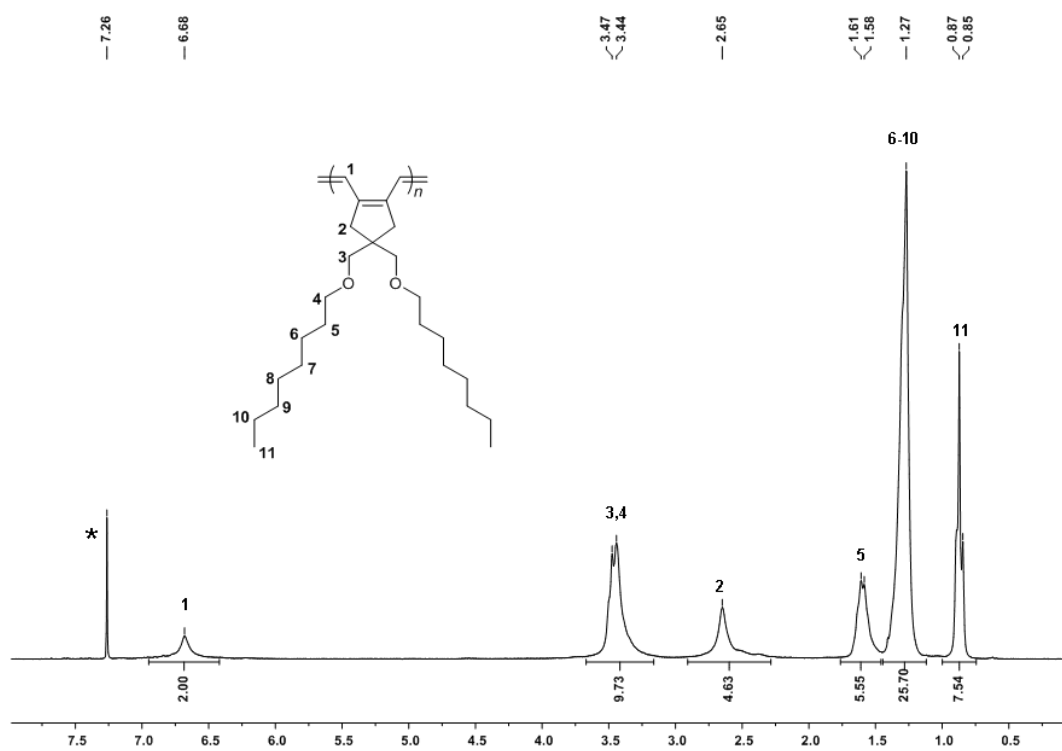

**Figure S3.** <sup>1</sup>H NMR spectrum of poly(**M1**)<sub>25</sub> synthesized by **I2** (\*denotes CDCl<sub>3</sub>).

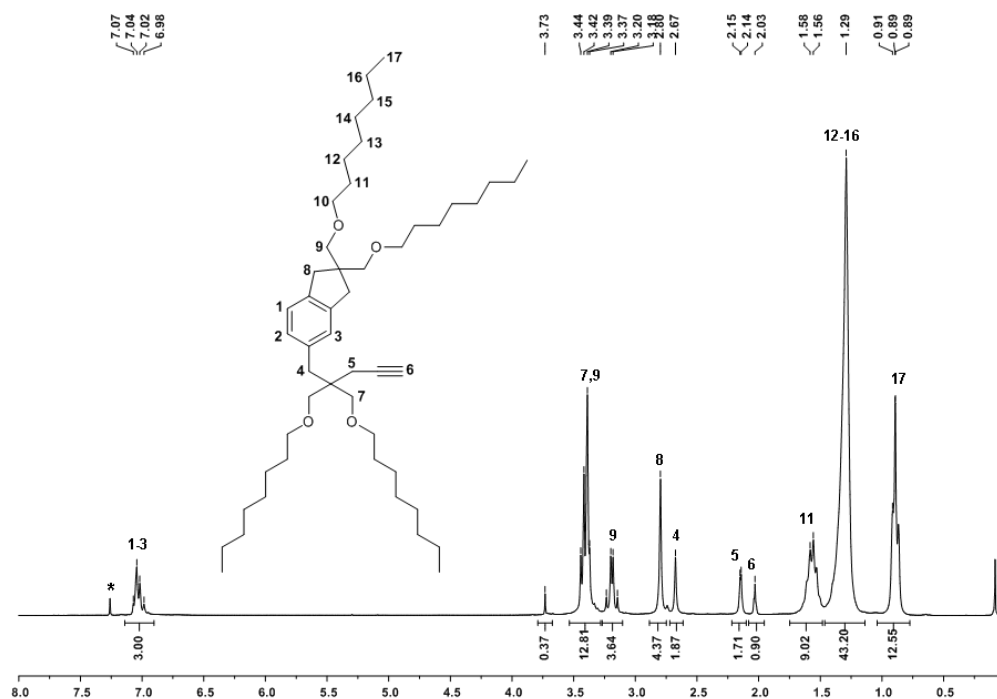

Figure S4. <sup>1</sup>H NMR spectrum of of the dimer 1 (\*denotes CDCl<sub>3</sub>).

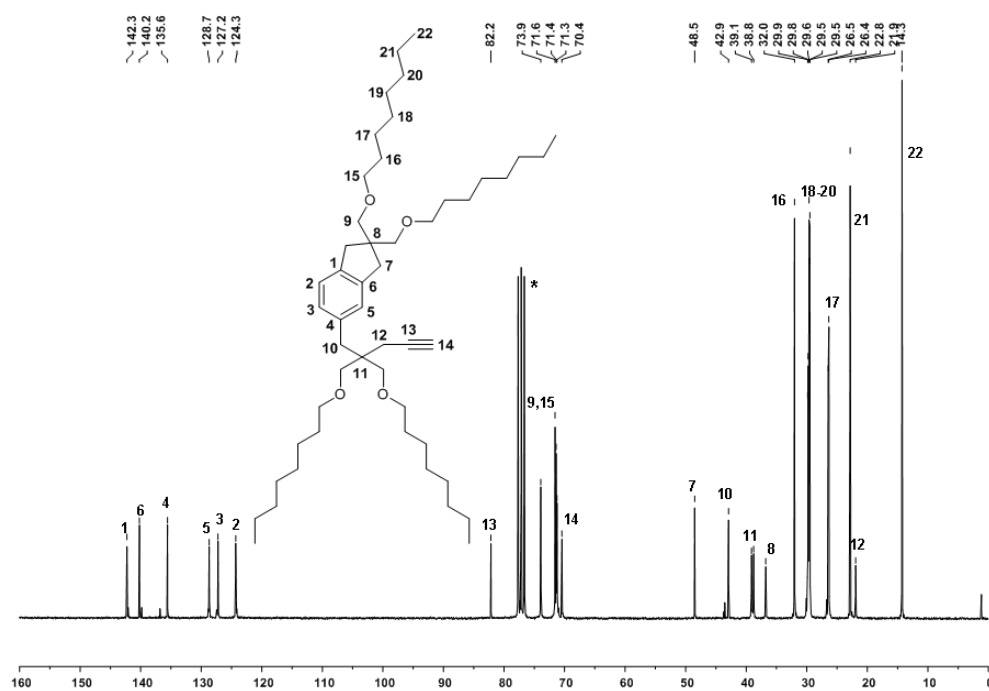

Figure S5. <sup>13</sup>C NMR spectrum of the dimer 1 (\*denotes CDCl<sub>3</sub>).

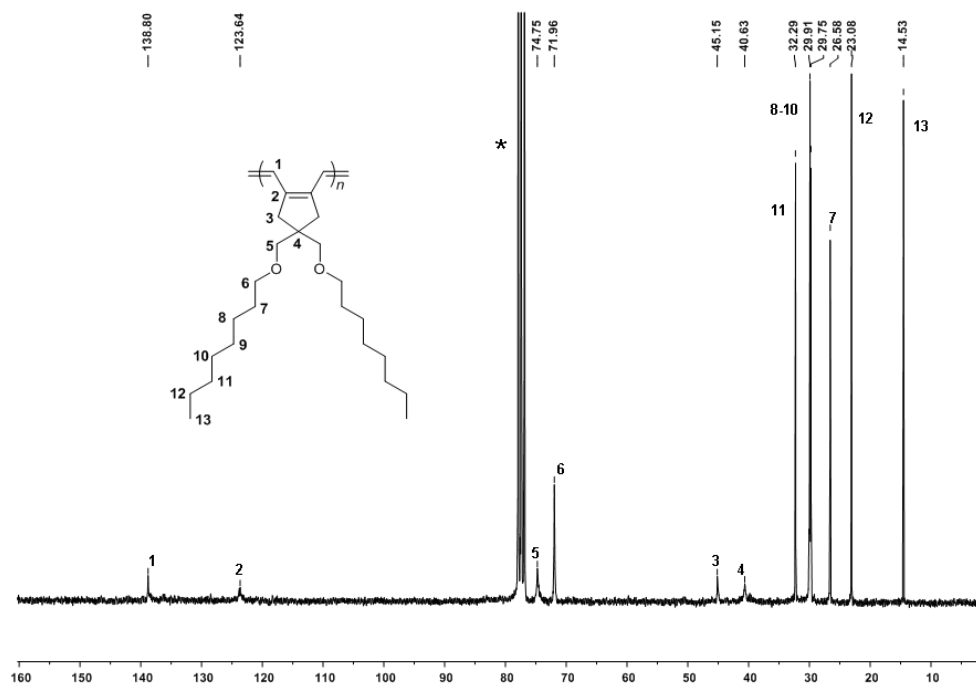

**Figure S6.**  $^{13}\text{C}$  NMR spectrum of poly(M1)<sub>25</sub> synthesized by **I4** in presence of quinuclidine  
(\*denotes CDCl<sub>3</sub>).

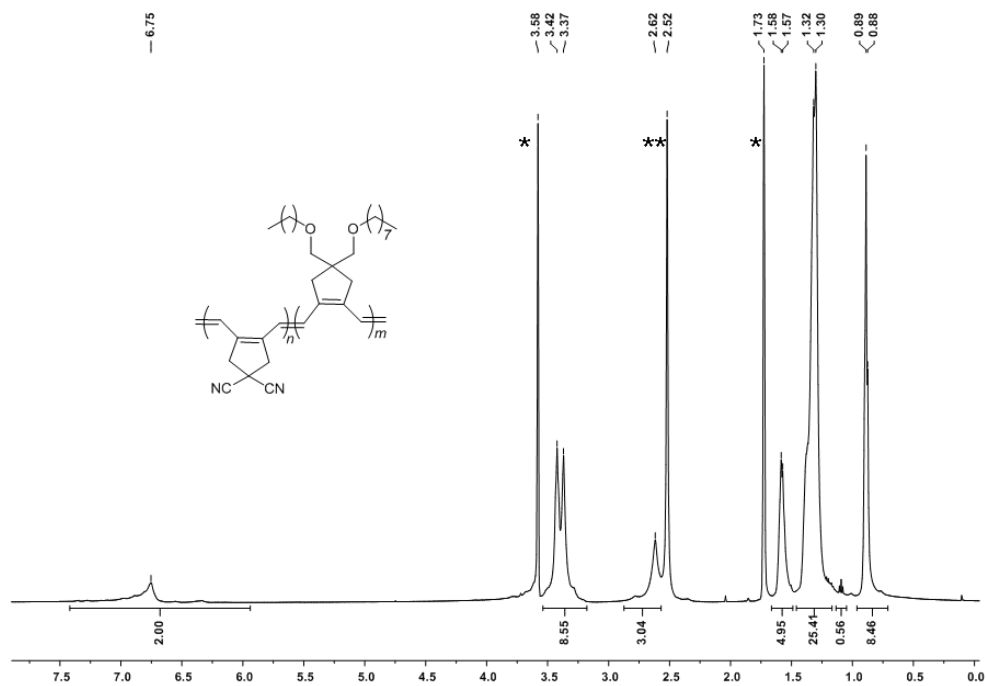

**Figure S7.**  $^1\text{H}$  NMR spectrum of poly(M2)<sub>15</sub>-b-poly(M1)<sub>25</sub> synthesized by **I4** in presence of quinuclidine (\*denotes THF-*d*8 and \*\*denotes water).

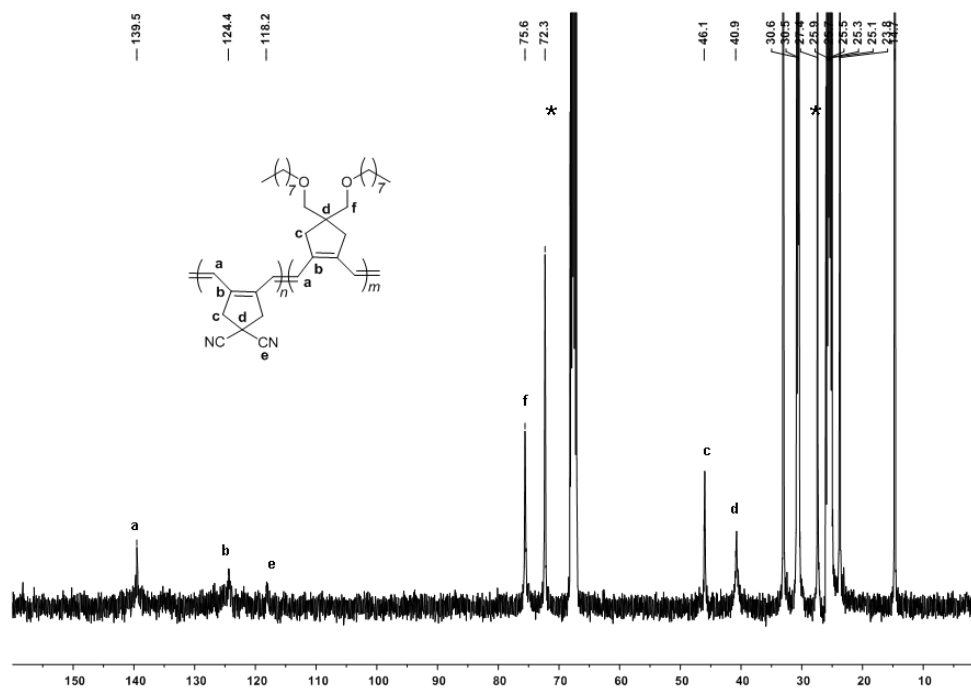

**Figure S8.** <sup>13</sup>C NMR spectrum of poly(M2)<sub>15</sub>-b-poly(M1)<sub>25</sub> synthesized by **I4** in the presence of quinuclidine (\*denotes THF-*d*<sub>8</sub>).

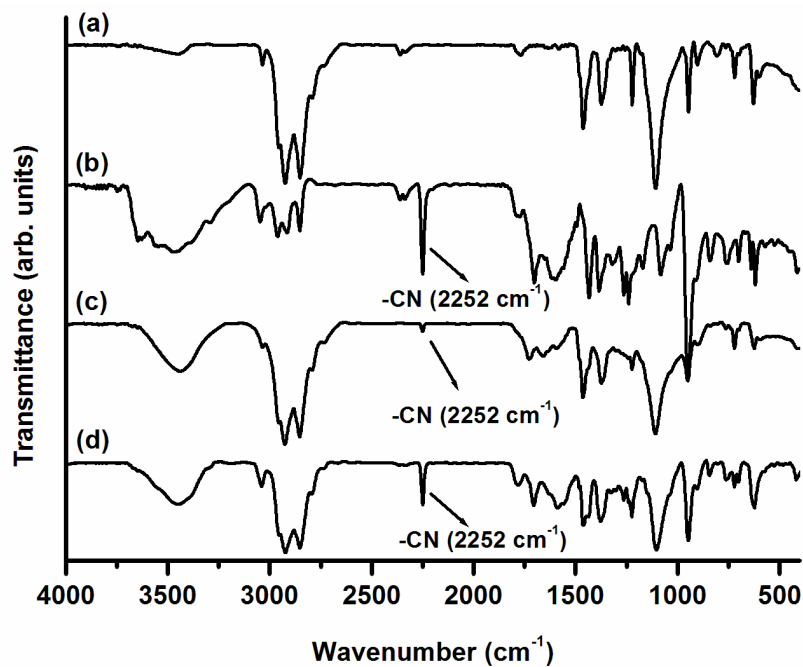

**Figure S9.** IR spectra (ATR mode) of the homo and block copolymers of **M1** and **M2**. (a) poly(M1), (b) poly(M2), (c) poly(M1)-b-poly(M2), (d) poly(M2)-b-poly(M1).

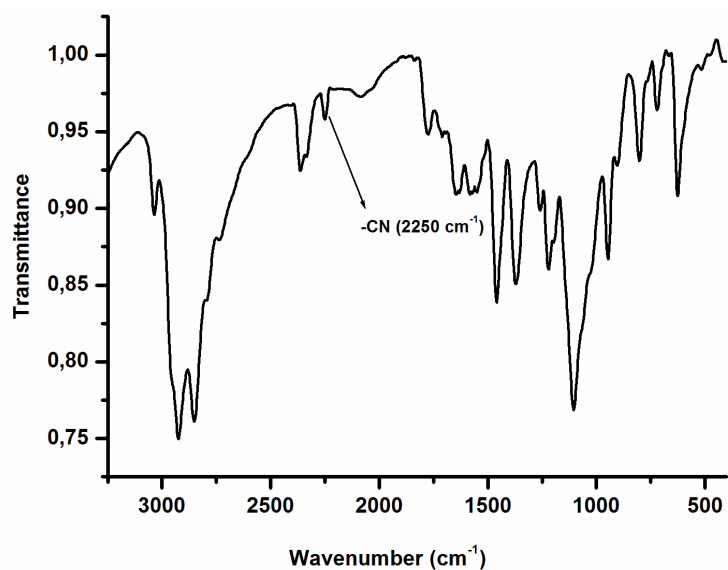

**Figure S10.** IR spectrum of telechelic poly(M2)-*b*-poly(M1) in the ATR mode.

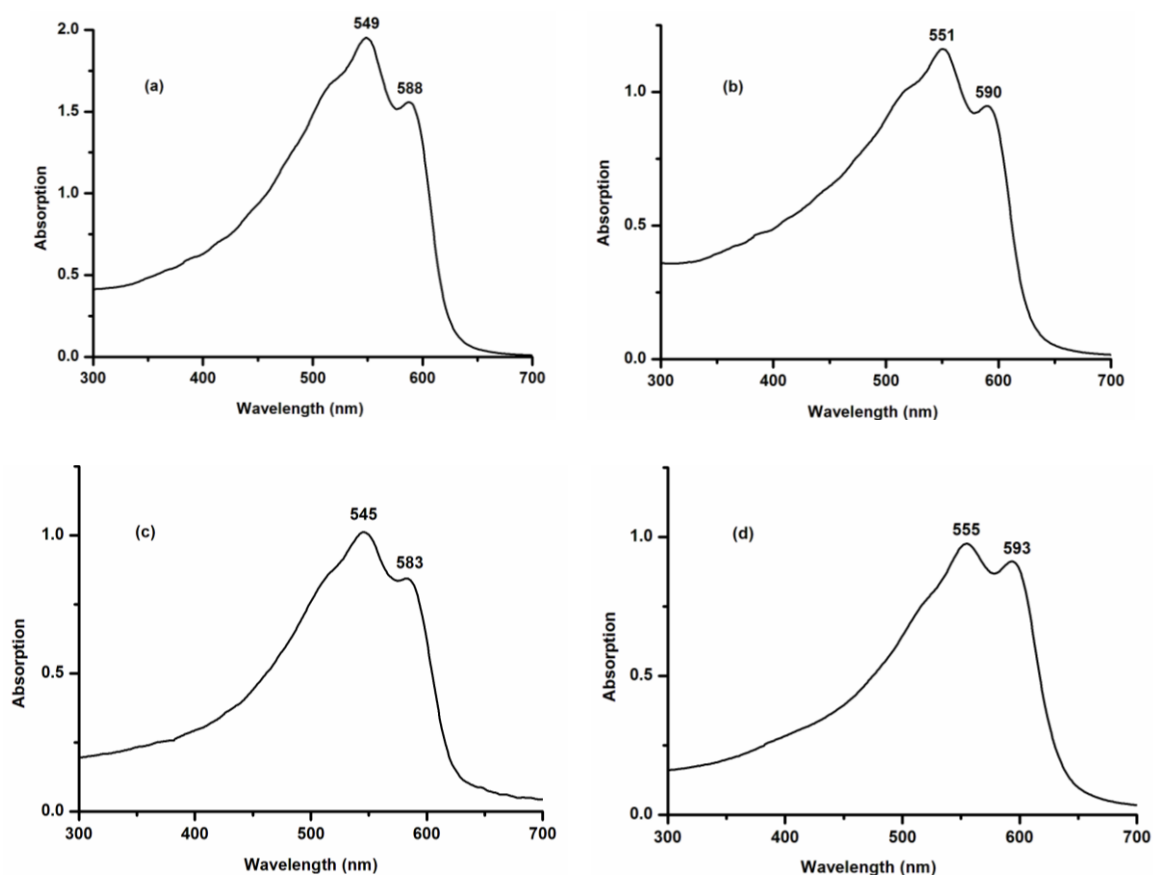

**Figure S11.** UV-vis spectra of the homo and block copolymers in CHCl<sub>3</sub>. (a) poly(M1) prepared by **I2**, (b) poly(M1) prepared by **I4**, (c) poly(M1)-*b*-poly(M2) prepared by **I4**, (d) poly(M2)-*b*-poly(M1) prepared by **I4**.

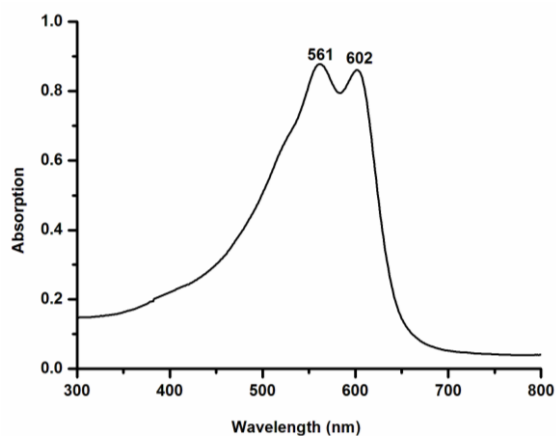

**Figure S12.** UV-vis spectra of telechelic poly(M2)-*b*-poly(M1) in CHCl<sub>3</sub>.

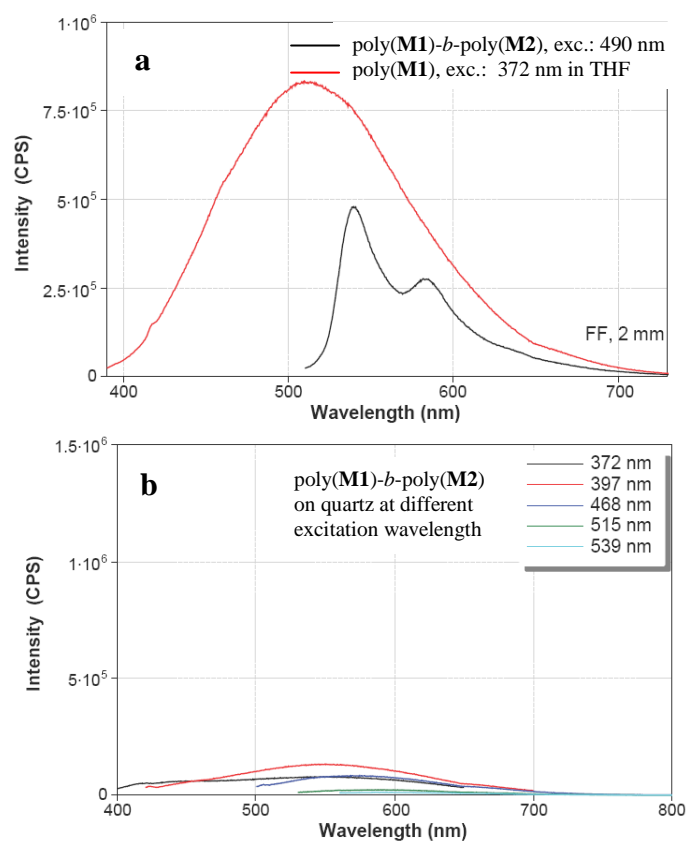

**Figure S13.** Emission spectra of poly(M1)-*b*-poly(M2) and poly(M1) in THF solution (a) and in thin films (b).

## References

- [1] T. L. Choi, R. H. Grubbs, *Angew. Chem. Int. Ed.* **2003**, *42*, 1743.

- [2] J. A. Love, J. P. Morgan, T. M. Trnka, R. H. Grubbs, *Angew. Chem. Int. Ed.* **2002**, *41*, 4035.
- [3] P. S. Kumar, K. Wurst, M. R. Buchmeiser, *Chem. Asian. J.* **2009**, *4*, 1275.
- [4] H. H. Fox, K. B. Yap, J. Robbins, S. Cai, R. R. Schrock, *Inorg. Chem.* **1992**, *31*, 2287.
- [5] . H. Oskam, H. H. Fox, K. B. Yap, D. H. McConville, R. O`Dell, B. J. Lichtenstein, R. R. Schrock, *J. Organomet. Chem.* **1993**, *459*, 185.
- [6] R. R. Schrock, J. S. Murdzek, G. C. Bazan, J. Robbins, M. DiMare, M. O'Regan, *J. Am. Chem. Soc.* **1990**, *112*, 3875.
- [7] H. H. Fox, M. O. Wolf, R. O'Dell, B. L. Lin, R. R. Schrock, M. S. Wrighton, *J. Am. Chem. Soc.* **1994**, *116*, 2827.
- [8] E. Diez-Barra, A. de la Hoz, A. Moreno, P. Sanchez-Verdu, *J. Chem. Soc., Perkin Trans. 1* **1991**, 2589.
- [9] M. Mayr, M. R. Buchmeiser, K. Wurst, *Adv. Syn. Catal.* **2002**, *344*, 712.
